1  **$\beta$ -actin mRNA interactome mapping by proximity biotinylation**

2

3 **Joyita Mukherjee<sup>1</sup>, Orit Hermesh<sup>1</sup>, Nicolas Nalpas<sup>2</sup>, Mirita Franz-Wachtel<sup>2</sup>, Boris Maček<sup>2</sup>,**

4 **Ralf-Peter Jansen<sup>1,3</sup>**

5 1 Interfaculty Institute of Biochemistry, University of Tübingen, Tübingen, Germany.

6 2 Proteome Center Tübingen, University of Tübingen, Tübingen, Germany.

7 3 Corresponding author: Ralf-Peter Jansen  
8 University of Tübingen  
9 Interfaculty Institute of Biochemistry  
10 Hoppe-Seyler-Strasse 4  
11 72076 Tübingen, Germany  
12 Phone: +49-7071-2974161  
13 Email: ralf.jansen@uni-tuebingen.de  
14

15 **KEYWORDS:**

16 RNA-BioID, mRNA localization, FUBP3, RNA binding protein, protein-RNA interaction, object-based  
17 co-localization  
18

19 **RUNNING TITLE:**

20 RNA-BioID identifies  $\beta$ -actin mRNA-associated proteins  
21

## 22 **ABSTRACT**

23 Function and fate of mRNAs are controlled by RNA binding proteins (RBPs) but determining the  
24 proteome of a specific mRNA *in vivo* is still challenging. RNA proximity biotinylation on the transported  
25  $\beta$ -actin mRNA tagged with MS2 aptamers (RNA-BioID) is used to characterize the dynamic proteome  
26 of the  $\beta$ -actin mRNP in mouse embryonic fibroblasts (MEFs). We have identified > 60  $\beta$ -actin  
27 associated RBPs including all six previously known as well as novel interactors. By investigating the  
28 dynamics of the  $\beta$ -actin mRNP in MEFs, we expand the set of  $\beta$ -actin mRNA associated RBPs and  
29 characterize the changes of the interacting proteome upon serum-induced mRNA localization. We  
30 report that the KH-domain containing protein FUBP3 represents a new  $\beta$ -actin associated RBP that  
31 binds to its 3'-untranslated region outside the known RNA localization element but is required for  $\beta$ -  
32 actin RNA localization. RNA-BioID will allow obtaining a dynamic view on the composition of  
33 endogenous mRNPs.

34

## 35 **INTRODUCTION**

36 The spatial distribution of mRNAs contributes to the compartmentalized organization of the cell and is  
37 required for maintaining cellular asymmetry, proper embryonic development and neuronal function<sup>1</sup>.  
38 Localized mRNAs contain cis-acting regions, termed zipcodes or localization elements that constitute  
39 binding sites for RNA-binding proteins (RBPs)<sup>2</sup>. Together with these RBPs, localized mRNAs form  
40 transport complexes containing molecular motors such as kinesin, dynein, or myosin<sup>3,4</sup>. These  
41 ribonucleoprotein complexes (RNPs) usually include accessory factors such as helicases,  
42 translational repressors, RNA stability factors or ribosomal proteins<sup>5</sup>. Thus, mRNPs as functional units  
43 do not only contain the information for an encoded polypeptide but also determine the precise spatio-  
44 temporal regulation of its translation, thereby facilitating the correct subcellular localization of the  
45 translation product<sup>6</sup>. One of the best-studied localized mRNAs is  $\beta$ -actin that encodes the  $\beta$  isoform of  
46 the cytoskeleton protein actin<sup>7,8,9</sup>.  $\beta$ -actin mRNA is localized to the leading edge of migrating  
47 fibroblasts<sup>10</sup> where its local translation critically contributes to the migrating behavior of this cell type<sup>7</sup>.  
48 In mouse<sup>10</sup> and *Xenopus*<sup>11</sup> neurons,  $\beta$ -actin mRNA is transported to the growth cone during axonal  
49 extension and its deposition and local translation is highly regulated by external cues. In addition,  
50 translation of this mRNA in dendritic spines is involved in re-shaping the postsynaptic site of  
51 synapses<sup>12</sup>. A well-defined localization element is located in the proximal region of the  $\beta$ -actin 3'

52 untranslated region (3'-UTR)<sup>13</sup>. This cis-acting signal is recognized by the zipcode-binding protein  
53 ZBP1<sup>14</sup>, an RBP of the conserved VICKZ RNA-binding protein family<sup>15</sup>. ZBP1 (also called IGF2BP1 or  
54 IMP1) interacts with the zipcode via two K-homology (KH) RNA-binding domains and is required for  
55 RNA localization in fibroblasts and neurons<sup>16</sup>. In addition, it controls translation of  $\beta$ -actin by blocking  
56 the assembly of ribosomes at the start codon<sup>17</sup>. IGF2BP1 appears to act as key RBP in  $\beta$ -actin mRNA  
57 distribution but several other proteins have been involved in  $\beta$ -actin mRNA localization, although their  
58 molecular function is less clear.

59 To fully understand mRNA localization and its regulation, it is important to know the proteins binding  
60 and controlling these mRNAs. Major technological advances like CLIP (crosslinking and  
61 immunoprecipitation) combined with next-generation sequencing allow the identification of RNAs  
62 bound to specific RBPs<sup>18,19</sup> or the system-wide identification of RBPs that bind to polyA RNA<sup>20,21</sup>.  
63 However, the major approaches to determine which proteins associate with a specific RNA have been  
64 affinity purification of modified or tagged RNAs together with their bound proteins, or co-  
65 immunoprecipitation of RNP components with the help of known RNA-specific RBPs. In addition,  
66 affinity capturing of specific RNPs with hybridizing antisense probes has been successfully  
67 used<sup>22,23,24</sup>. A serious limitation of these techniques is the potential loss of low affinity binders during  
68 purification, which has so far been addressed by *in vivo* UV cross-linking prior to cell lysis. However,  
69 cross-linking enhances only the recovery of RBPs directly contacting nucleobases and therefore does  
70 not overcome the loss of other physiologically important RNA interactors, e.g. motor or adapter  
71 proteins. These limitations could be overcome by *in vivo* labelling of proteins while they are  
72 associated with the target RNA. BioID<sup>25</sup> has been successfully used to detect subunits of large and  
73 dynamic protein complexes like the nuclear pore complex<sup>26</sup> or centrosome<sup>27</sup>. In BioID, a protein of  
74 interest is fused to a mutant version of the *E. coli* biotin ligase BirA (BirA\*) that generates AMP-biotin  
75 ('activated biotin'), which reacts with accessible lysine residues in its vicinity<sup>28</sup>. After lysis, biotinylated  
76 proteins can be isolated via streptavidin affinity purification and identified using standard mass  
77 spectrometry techniques. Recently, BioID has also been applied to identify proteins associated with  
78 the genomic RNA of ZIKA virus<sup>29</sup>. We have adapted it to characterize the proteome of an  
79 endogenous, localized  $\beta$ -actin mRNP. We report here that tethering of BirA\* to an endogenous  
80 transcript does not only allow the identification of its associated proteins but can also be used to  
81 probe the environment of this mRNA. This approach allows, with high confidence, to identify novel

82 functional  $\beta$ -actin interactors that are as highly enriched as already reported  $\beta$ -actin interacting  
83 proteins IGF2BP1, IGF2BP2<sup>30</sup>, RACK1<sup>31</sup>, KHSRP<sup>32</sup>, KHDBRS1/Sam68<sup>33,34</sup>, and FMR1<sup>35,36</sup>. This is  
84 exemplified by FUBP3/MARTA2, an RBP from the conserved FUBP family of proteins<sup>37,38</sup> which was  
85 previously shown to mediate dendritic targeting of MAP2 mRNA in neurons<sup>39,40</sup> but is shown here to  
86 bind to and facilitate localization of  $\beta$ -actin mRNA to fibroblast protrusions. FUBP3 does not bind to  
87 the zipcode or IGF2BP1 and mediates  $\beta$ -actin RNA localization by binding to its 3'-UTR.

88

## 89 RESULTS

### 90 Tethering a biotin ligase to the 3'-UTR of $\beta$ -actin mRNA

91 To tether BirA\* to the 3'-UTR of  $\beta$ -actin mRNA (Figure 1a), we stably expressed a fusion of the MS2  
92 coat protein (MCP)<sup>41</sup>, eGFP and BirA\* (MCP-eGFP-BirA\*) in immortalized mouse embryonic  
93 fibroblasts (MEFs) from transgenic  $\beta$ -actin-MBS mice<sup>42</sup>. These mice have both  $\beta$ -actin gene copies  
94 replaced by  $\beta$ -actin with 24 MS2 binding sites (MBS) in their distal 3'-UTR. In addition, MCP-eGFP-  
95 BirA\* or MCP-eGFP was also stably expressed in control MEFs with untagged  $\beta$ -actin. Co-expression  
96 of MCP-eGFP<sup>42</sup> or MCP-eGFP-BirA\* (Supplementary Figure S1) does not affect  $\beta$ -actin mRNA and  
97 protein levels. Proximity labeling was performed by addition of 50  $\mu$ M biotin to the medium at least for  
98 6 hrs<sup>28</sup>. In cells expressing  $\beta$ -actin-MBS / MCP-eGFP-BirA\* but not in control cells expressing only  
99 MCP-eGFP (Figure 1a) we observed biotinylation of numerous proteins in addition to the endogenous  
100 biotinylated proteins seen in cultured cells<sup>25</sup> (Figure 1). To test if proximity labeling can identify known  
101  $\beta$ -actin mRNA-associated proteins, we affinity purified biotinylated proteins followed by Western Blot  
102 detection of IGF2BP1 (mouse ZBP1). IGF2BP1 was biotinylated in MEFs expressing MCP-eGFP-  
103 BirA\* but not in those expressing MCP-eGFP (Figure 1b) which demonstrates that our tool can  
104 successfully biotinylate zipcode interacting protein. Since biotinylation or the expression of the MCP-  
105 eGFP-BirA\* might affect localization of the  $\beta$ -actin mRNA, we also checked proper targeting of  $\beta$ -actin  
106 mRNA to cell protrusions. To induce localization, MEFs expressing or non-expressing the biotin  
107 ligase-containing fusion protein were serum starved for 24 hrs and stimulated for 2 hrs<sup>7,10</sup>. In both  
108 MEF lines, we observed formation of motile cytoplasmic mRNPs and their targeting to cell protrusions  
109 (Figure 1c). We expected that a major fraction of biotinylated proteins is MCP-eGFP-BirA\* itself. We  
110 therefore aimed at depleting the fusion protein from the lysate by GFP pulldown prior to streptavidin  
111 affinity purification. Surprisingly, most of the biotinylated proteins were enriched in the GFP pulldown

112 fraction (Figure 1d, lane 2), which is likely due to co-purification of MCP-eGFP-BirA\*,  $\beta$ -actin mRNA  
113 and biotinylated proteins binding to the mRNA or the fusion protein. RNA degradation with RNase A  
114 (Supplementary Figure S2) shifted a large part of the biotinylated proteins into the streptavidin fraction  
115 (Figure 1d, lane 8), supporting the idea that most of the biotinylated proteins are associated with  $\beta$ -  
116 actin mRNA. Additional treatment with high salt and 0.5% SDS further optimized the streptavidin  
117 affinity purification and decreased the background binding of the magnetic beads used in this  
118 purification (Figure 1d, lane 12).

119

### 120 **$\beta$ -actin mRNA interactors under serum-induced and uninduced conditions**

121  $\beta$ -actin mRNA localization to the lamellipodia of chicken and mouse fibroblasts increases after serum  
122 induction<sup>43</sup>. It was also shown that during serum starvation, cells enter a quiescent phase of the cell  
123 cycle<sup>44</sup> with an overall reduction in actin stress fibers or focal adhesions<sup>43</sup>. Since efficient biotinylation  
124 and capturing requires 6 hrs of incubation with biotin, we next applied smFISH to verify that  $\beta$ -actin  
125 mRNA localization persists during our labeling period. As shown before<sup>42</sup>, mouse fibroblasts induce  $\beta$ -  
126 actin mRNA localization after serum addition (Supplementary Figure S3a) and the fraction of MEFs  
127 with  $\beta$ -actin localized to lamellipodia increases within one hour but remains constant over the next 6  
128 hours (Supplementary Figure S3b). This situation gives us an opportunity to biotinylate proteins that  
129 are associated with localizing  $\beta$ -actin mRNA during the required 6-hour labelling window.

130 To determine and compare the  $\beta$ -actin associated proteomes in uninduced and serum-induced MEFs,  
131 we performed RNA-BioID under both conditions (three replicate experiments each). Unspecific as well  
132 as endogenous biotinylation was assessed by performing BioID in MEFs expressing NLS-MCP-  
133 eGFP-BirA\* in the absence of MS2 aptamers. Affinity-captured biotinylated proteins were identified  
134 and quantified by mass spectrometry using label free quantification (LFQ; see Methods). Principal  
135 component analysis of the datasets revealed that the different conditions cluster apart from each  
136 other in dimensions 1 and 2 (explaining 33.8% and 15.5% of variance), while the replicates within the  
137 same condition cluster together showing good biological reproducibility (Supplementary Figure S4).  
138 We furthermore calculated the Spearman correlation between all sample types and replicates, which  
139 demonstrates the high reproducibility between biological replicates (correlation  $\geq 0.97$ ). In addition, it  
140 showed better correlation between uninduced and induced samples (average 0.95) compared to  
141 control (Supplementary Figure S5). In total, there were 169 (or 156) significantly enriched proteins in

142 induced (or uninduced) MEFs compared to control cells (Supplementary Figure S6). Of these, 47  
143 were enriched only under induced conditions (Supplementary table 4). To assess the differential  
144 enrichment of the proteins under each condition, a Tukey post-hoc test was performed after the  
145 ANOVA, and the significance was set to an adjusted p-value of 0.05 following Benjamini-Hochberg  
146 multiple correction testing (see Materials and Methods). A large fraction of the enriched proteins (30%  
147 and 34%) under induced, or uninduced conditions respectively, represent RNA-binding proteins  
148 (Figure 2, red solid circles). Among these are the majority of RBPs (IGF2BP1, IGF2BP2, KHSRP,  
149 KHDRBS1, FMR1, HuR<sup>45</sup>, RACK1) already known to control specific aspects of  $\beta$ -actin mRNA  
150 physiology. Other enriched RBPs have been associated with the localization of mRNAs in other cell  
151 types or organisms, including STAU1 and STAU2<sup>46</sup>, SYNCRIP<sup>47</sup>, and FUBP3<sup>48</sup>. Furthermore, 85  
152 proteins were significantly enriched under serum-induced compared to uninduced conditions  
153 (Supplementary figure S6). However, the majority of the above mentioned RBPs (including IGF2BP1)  
154 become biotinylated under induced as well as uninduced conditions, indicating that they are  
155 associated with  $\beta$ -actin mRNA under both conditions (Figure 2c).

156 A cluster analysis (Figure 3) reveals at least five different patterns of biotinylated proteins in induced,  
157 non-induced and control MEFs (Figure 3b, c). In control MEFs, we see enrichment of mainly nuclear  
158 proteins (cluster 1). This is expected since the unbound MCP-eGFP-BirA\* is enriched in the nucleus  
159 due to an N terminal nuclear localization sequence<sup>49</sup> (Figure 1c). Cluster 1 also contains abundant  
160 cytoplasmic proteins like glycerol aldehyde phosphate dehydrogenase (GAPDH). Cluster 3 represents  
161 proteins that are equally found in MEFs under all conditions and contains e.g. ribosomal proteins.

162 Proteins allocated to the other three clusters (clusters 2, 4, 5) are overrepresented in the biotinylated  
163 proteome of MEFs expressing  $\beta$ -actin-MBS. Of specific interest are clusters 4 and 5. In cluster 4, with  
164 proteins that are more biotinylated under serum-induced conditions, we find RNA-binding proteins,  
165 among them FMR1 and KHSRP<sup>32</sup> that have been reported to function in  $\beta$ -actin mRNA localization or  
166 bind to IGF2BP1. Another group of proteins that are enriched in this cluster are proteins of the actin  
167 cytoskeleton (e.g. Filamin B, Cofilin-1, Myh9, Tpm4, Plastin-3). Their enrichment likely reflects the  
168 deposition of the  $\beta$ -actin mRNA in the actin-rich cortical environment of the MEF's leading edge.

169 Finally, cluster 5 contains proteins found in  $\beta$ -actin-MBS MEFs under induced as well as non-induced  
170 conditions but not in control MEFs. This cluster shows an enrichment for proteins involved in mRNA-  
171 binding, RNP constituents or ribosomal proteins. Since this cluster contains the zipcode-binding

172 protein IGF2BP1, we hypothesized that other proteins in this cluster, e.g. FUBP3 are likely candidates  
173 for  $\beta$ -actin mRNA regulatory factors.

174

### 175 **FUBP3 is a component of the $\beta$ -actin mRNP**

176 To confirm the association of FUBP3 and MS2-tagged  $\beta$ -actin mRNA, we transfected MEFs  
177 expressing  $\beta$ -actin-MBS/MCP-GFP cells with plasmids encoding either FUBP3-mCherry or IGF2BP1-  
178 mCherry (Supplementary Figure S8a). An object based colocalization analysis of snapshot images  
179 was used to determine the extent of colocalization of each of the two proteins with  $\beta$ -actin mRNA<sup>50</sup>.  
180 For comparison of colocalization levels, a clipping point was chosen as the midway between zero  
181 distance and the onset of the random dominated colocalization (the plateau), represented also as the  
182 pick in the derivative graph which in our case was at 150 nm (Supplementary figure S8b-d). The  
183 colocalization of  $\beta$ -actin-MBS mRNA with each protein at this clipping point distance was small but  
184 significant with  $6.6 \pm 4.1\%$  for IGF2BP1 and  $4.4 \pm 6.2\%$  for FUBP3 (Supplementary figure S8e). To  
185 test if the observed colocalization of the mCherry fusion proteins is in the range of the endogenous  
186 proteins, we combined single-molecule FISH (smFISH) against  $\beta$ -actin-MBS and immunofluorescence  
187 (smFISH-IF) using antibodies against FUBP3 and IGF2BP1 (Figure 4a). We also included IGF2BP2  
188 in this analysis since it has been suggested to interact with IGF2BP1 and  $\beta$ -actin mRNA<sup>30</sup> and was  
189 found in our analysis in the same cluster as IGF2BP1 and FUBP3 (Figures 2 and 3). smFISH with  
190 probes against the  $\beta$ -actin ORF and the MBS part allowed us to estimate the feasibility of our method  
191 to detect colocalization (Figure 4a). 5.8% of  $\beta$ -actin mRNA signals co-localize with FUBP3, 4% co-  
192 localize with IGF2BP2 and 10.3% co-localize with IGF2BP1 (Figure 4c, supplementary figure S9).  
193 Applying the same colocalization to  $\beta$ -actin ORF and the MBS part, 31% of MS2 probes were found to  
194 colocalize with  $\beta$ -actin ORF. This indicates that our colocalization analysis likely underestimates the  
195 degree of true colocalization by a factor of three. One of the reasons for this low number could be the  
196 high number and crowdedness of distributed signals in case of  $\beta$ -actin mRNPs resulting in an  
197 increase in random estimated colocalization values that were used to evaluate true colocalization.  
198 Furthermore, our setup lacked the high-level correction for chromatic and mechanical microscope  
199 aberration that was shown to be beneficial for the correct quantification of these interactions<sup>51</sup>. The  
200 quantitative analysis of colocalization between  $\beta$ -actin and FUBP3, although being in the same range  
201 of IGF2BP1 (6-10 %), is still lower than expected. Aside from the technical reasons, the low value

202 could be due to the use of immortalized MEFs. In contrast to primary MEFs, immortalized MEFs have  
203 a lower efficiency of  $\beta$ -actin localization, which is likely due to increased phosphorylation of IGF2BP1  
204 and its release from the zipcode<sup>52,50</sup>. Alternatively, the low degree of colocalization could be due to the  
205 dynamic interaction of FUBP3 and IGF2BP1 with the  $\beta$ -actin mRNP<sup>53</sup>. Analyzing snap shots of this  
206 interaction could therefore also result in an underestimation of the RBP's association with  $\beta$ -actin  
207 mRNA as it was shown in the case of kinesin-1 interaction with oskar mRNA in *Drosophila oocytes*<sup>50</sup>.  
208

### 209 **FUBP3 binds to the 3'-UTR of $\beta$ -actin mRNA**

210 To validate our colocalization experiments, we performed co-immunoprecipitation of  $\beta$ -actin mRNA  
211 with FUBP3 and IGF2BP1 (Figure 5a). Both proteins co-precipitate four tested mRNAs ( $\beta$ -actin,  
212 Cofilin1, Igf2bp1, Fubp3). In case of IGF2BP1, it binds to all the mRNAs tested, which reflects  
213 previous observations in HeLa cells, where almost 3% of the transcriptome was shown to bind to  
214 IGF2BP1<sup>54</sup>.  $\beta$ -actin binding to FUBP3 (23% of input bound to FUBP3) was less efficient than to  
215 IGF2BP1 (37%) (which also correlates with the microscopy results). We also detected FUBP3 and  
216 IGF2BP1 binding to another localized mRNA, Cof1<sup>55</sup> to a similar extent (48%). Since co-precipitation  
217 of these mRNAs with FUBP3 could be indirect, e.g. via IGF2BP1, we used recombinant glutathione S  
218 transferase (GST)-FUBP3 and IGF2BP1 (Supplementary figure S10) in pulldown assays to test direct  
219 binding to *in vitro* transcribed RNA fragments of  $\beta$ -actin mRNA. We selected the 54 nucleotide  
220 localization zipcode element of  $\beta$ -actin, a 49 nucleotide long region after the zipcode (proximal  
221 zipcode)<sup>14</sup> and the 643bp long whole  $\beta$ -actin 3'-UTR. RNA captured by the GST fusion proteins was  
222 detected by quantitative RT-PCR and normalized to the input. As negative controls, GST protein and  
223 a zipcode mutant RNA unable to bind to IGF2BP1<sup>56,57</sup> were used. Unlike IGF2BP1, FUBP3 does not  
224 bind to the zipcode but does interact with the 3'UTR of  $\beta$ -actin mRNA, suggesting that it recognizes a  
225 different site in the 3'-UTR (Figure 5b). A recent publication<sup>58</sup> revealed that FUBP3 binds the motif  
226 UAUUA, which is also present at the 3'UTR of  $\beta$ -actin mRNA, 459bp downstream of the stop codon. To  
227 further substantiate our finding that FUBP3 can bind independently of IGF2BP1 to  $\beta$ -actin mRNA, we  
228 performed co-immunoprecipitation experiments of IGF2BP1 and FUBP3 (Figure 5c). We did not  
229 detect co-immunoprecipitation of IGF2BP1 and FUBP3. However, as reported<sup>59</sup>, we see that  
230 IGF2BP2 binds to IGF2BP1, indicating physical interaction between these two proteins. We conclude  
231 that FUBP3 does not directly bind to IGF2BP1.



232 To identify the KH domain of FUBP3 responsible for interaction with  $\beta$ -actin mRNA, we introduced  
233 mutations in the conserved KH domains of the protein. Each functionally important G-X-X-G motif in  
234 the four KH domains was changed to an inactive version (G-D-D-G)<sup>60</sup> and individual mutant proteins  
235 were transiently expressed in MEFs as C-terminally tagged mCherry fusion protein. The G-D-D-G  
236 mutation in KH domain KH2 resulted in loss of the cytoplasmic punctate staining seen in wild type  
237 FUBP3, which is reminiscent of a similar punctate pattern observed for mRNPs (Figure 5d). We  
238 conclude that KH2 in FUBP3 is important for its integration into RNP particles and likely constitutes  
239 the critical domain for RNA binding.

240

#### 241 **Loss of FUBP3 affects $\beta$ -actin mRNA localization**

242 To validate that proteins identified by RNA-BioID are functionally significant for the mRNA used as  
243 bait, we performed knockdown experiments for Fubp3. Knockdown of Igf2bp1 was used as a positive  
244 control for a factor involved in  $\beta$ -actin localization. The knockdown effectiveness was validated by  
245 western blot against IGF2BP1 and FUBP3, using GAPDH and  $\beta$ -ACTIN as controls (Figure 6a, b, and  
246 Supplementary figure S11). The effect of the knockdown on  $\beta$ -actin mRNA localization was assessed  
247 by smFISH (Figure 6c and supplementary figure S12). In control cells, up to 47% of MEFs show  
248 localized  $\beta$ -actin mRNA in their protrusions (Figure 6c). IGF2BP1 knockdown reduces this to 32%  
249 while FUBP3 knockdown leads to a reduction to 21% (Figure 6c). This indicates that FUBP3 is  
250 important for  $\beta$ -actin mRNA localization. In addition, we found that knockdown of Igf2bp1 or Fubp3  
251 only mildly changes  $\beta$ -actin mRNA levels (79% of wild type in case of Igf2bp1 knockdown, 93% in  
252 case of Fubp3). In contrast, the level of  $\beta$ -actin protein increases to 120%, or 150%, respectively  
253 (Figure 6a, b). In case of IGF2BP1, this is consistent with previous reports showing that the protein  
254 acts as translational repressor of  $\beta$ -actin mRNA and that localization defects seen after loss of  
255 IGF2BP1 are due to premature translation of the mRNA before reaching its normal destination  
256 site<sup>17,61</sup>. FUBP3 could perform a similar role on  $\beta$ -actin mRNA.

257

#### 258 **DISCUSSION**

259 Proximity biotinylation has facilitated the characterization of dynamic protein complexes by *in vivo*  
260 labeling of interaction partners. Here, we exploit this approach and demonstrate its utility for  
261 identifying functionally relevant RNA-binding proteins of a specific mRNA, mammalian  $\beta$ -actin. This is

262 achieved by combining MS2 tagging of the mRNA of choice and co-expression of a fusion protein of  
263 the MS2 coat proteins (MCP) and the biotin ligase (BirA\*).

264 The primary goal for an RNA-based BioID is the identification of novel RNA interactors. As seen  
265 before in several proximity labeling (BioID or APEX-driven) approaches<sup>62,63,64</sup>, the number of identified  
266 potential interactors for  $\beta$ -actin is far higher than the number of proteins identified in classical co-  
267 immunoprecipitation or co-affinity purification approaches. This might be due to the higher sensitivity  
268 of proximity labeling or its propensity to allow capturing of transient interactors<sup>62</sup>. Although this can  
269 result in a skewed view of the actual components of a complex due to the rapid change of the  
270 composition of mRNP, it is beneficial in order to identify all the mRNP components during the life  
271 stages of an mRNA. The most highly represented class of proteins were RBPs (Figure 3 and S7b),  
272 among them all RBPs that have been previously associated with localization, translational control or  
273 (de)stabilization of  $\beta$ -actin mRNA. Other RBPs like survival of motor neuron 1 (SMN1), which supports  
274 the association of IGF2BP1 with  $\beta$ -actin mRNA<sup>65,66</sup>, were also found to be enriched in MEFs  
275 expressing  $\beta$ -actin-MBS compared to control MEFs, although with lower significance (p-value < 0.1).  
276 We also analyzed our dataset for motor proteins involved in mRNA transport. Neither MYH10<sup>67</sup> nor  
277 KIF11<sup>68</sup> that have been suggested to work as  $\beta$ -actin mRNA transport motors were found as  
278 biotinylated proteins. In contrast, the only motor we identified is MYH9, the heavy chain of a MYH10  
279 related class II-A myosin although it was not significantly enriched (p = 0.08). The lack of motor  
280 proteins is compatible with a recent observation that  $\beta$ -actin localization in fibroblasts works primarily  
281 by diffusion to and trapping in the microfilament-rich cortex<sup>42</sup>. This is also corroborated by our finding  
282 that components of the actin-rich cell protrusion (Figure 3, cluster 4) are heavily biotinylated in MEFs  
283 after serum-induced localization of  $\beta$ -actin.

284 Overall, the cluster analysis shows that the majority of previously identified  $\beta$ -actin RBPs behave  
285 similarly under the two tested conditions (serum-induced and uninduced MEFs). This not only  
286 indicates that they interact with  $\beta$ -actin mRNA in MEFs even under steady state conditions, but it also  
287 makes it likely that other proteins, especially RBPs, found in this cluster might represent so far  
288 unknown  $\beta$ -actin mRNA interactors. By choosing the far-upstream binding protein FUBP3 as a  
289 potential candidate we demonstrate that this assumption holds true for at least this protein. FUBP3  
290 not only binds to  $\beta$ -actin mRNA but its knockdown also results in a similar decrease of  $\beta$ -actin  
291 localization to the leading edge as seen for loss of IGF2BP1.

292 FUBP3, also named MARTA2 has been reported to bind to the 3'-UTR of the localized MAP2 mRNA  
293 in rat neurons<sup>40</sup> and regulates its dendritic targeting<sup>48</sup>. Although the binding site of FUBP3 in MAP2  
294 mRNA is not known, its preferred binding motif (UUAU) was recently identified<sup>58</sup>. This motif is present  
295 in the 3'-UTR of  $\beta$ -actin 405 bp downstream of the zipcode. FUBP proteins might play a more  
296 substantial role in RNA localization since homologs of a second member of the FUBP family, FUBP2  
297 were not only reported to be involved in MAP2 or  $\beta$ -actin mRNA localization<sup>48,32</sup> but also present  
298 among the biotinylated proteins we identified. However, FUBP2 is mainly nuclear and its role in  $\beta$ -  
299 actin mRNA localization might be indirect<sup>32</sup>. In contrast, FUBP3 seems to have a direct function in  
300 localizing  $\beta$ -actin. Although we observed only little colocalization of  $\beta$ -actin mRNPs and FUBP3,  
301 colocalization was in the range of that seen for IGF2BP1. More important, FUBP3 binds to the 3'-UTR  
302 and its loss reduces  $\beta$ -actin mRNA localization. FUBP3 and IGF2BP1 do not bind directly to each  
303 other. Finally, IGF2BP1 levels are not affected by Fubp3 knockdown, ruling out an indirect effect on  $\beta$ -  
304 actin mRNA localization via changing IGF2BP1 amounts. What might therefore be the function of  
305 FUBP3? A potential function could be translational regulation. Similar to Igf2bp1 knockdown, loss of  
306 FUBP3 results in increased amounts of  $\beta$ -actin protein while  $\beta$ -actin mRNA levels are similar to or  
307 even lower than in untreated MEFs. This could be due to a loss of translational inhibition as it has  
308 been shown for IGF2BP1.

309 Its role in  $\beta$ -actin and MAP2 mRNA localization suggests that FUBP3/MARTA2 is a component of  
310 several localizing mRNPs. Of note, RNA-BioID on  $\beta$ -actin mRNA has identified even more RBPs that  
311 have been previously involved in the localization of other mRNAs, e.g. SYNCRIP<sup>69</sup> or Staufen<sup>46</sup>.

312 Several of these like STAU1 and STAU2 are highly enriched in our  $\beta$ -actin biotinylated proteome. This  
313 finding might on one hand reflect the participation of multiple RBPs in  $\beta$ -actin localization or  
314 regulation. It also shows that a common set of RBPs is used to control the fate of several different  
315 localized mRNAs in different cell types. Although RNA-BioID does not currently allow us to determine  
316 if all these RBPs are constituents of the same  $\beta$ -actin mRNP, belong to different states of an mRNP or  
317 to different populations, their identification now allows addressing these questions to reach a more  
318 detailed understanding of the common function of RBPs on diverse mRNAs.

319  
320  
321

322 **MATERIALS AND METHODS**

323 Cell culture methods as well as general molecular and cell biology techniques including plasmid  
324 cloning, lentiviral transfection and selection, immunoprecipitation and western blotting, and *in situ*  
325 hybridization are described in Supplementary Methods.

326

327 **RNA-BioID:** For RNA-BioID, cells were incubated with 50  $\mu$ M biotin at least for 6 hrs. Following  
328 incubation, cells were washed twice with 1x PBS and lysed in IP lysis buffer (50 mM Tris pH 7.5, 150  
329 mM NaCl, 2.5 mM MgCl<sub>2</sub>, 1 mM DTT, 1% tween-20, and 1x proteinase inhibitor) and passed 10-12  
330 times through a 21G needle. The lysate was cleared by centrifugation (12,000 x g for 10 min at 4°C)  
331 to remove cell debris. 10  $\mu$ g of protein from the supernatant ('total cell lysate') were used to check for  
332 protein biotinylation. In the remaining lysate, NaCl was added to a final concentration of 500 mM. 200  
333  $\mu$ l of a streptavidin magnetic bead suspension (GE Healthcare) were added and the high salt lysate  
334 incubated overnight at 4°C with end to end rotation. On the next day, the beads were collected (by  
335 keeping the beads on the magnetic stand for 2 min) and washed as described before<sup>28</sup>. In detail, they  
336 were washed twice for 5 min with 0.3 ml wash buffer 1 (2% SDS), once with wash buffer 2 (0.1% (w/v)  
337 deoxycholate, 1% (w/v) tween-20, 350 mM NaCl, 1 mM EDTA pH 8.0), once with wash buffer 3 (0.5%  
338 (w/v) deoxycholate 0.5% (w/v) tween-20, 1 mM EDTA, 250 mM LiCl, 10 mM Tris-HCl pH 7.4) and 50  
339 mM Tris-HCl pH 7.5, once with wash buffer 4 (50 mM NaCl and 50 mM Tris-HCl pH 7.4), and finally  
340 twice with 500  $\mu$ l of 50 mM ammonium bicarbonate. 20  $\mu$ l of the beads were used for western blot and  
341 silver staining, and 180  $\mu$ l was subjected to mass spectrometry analysis. To release captured proteins  
342 for western blot analysis from streptavidin beads, the beads were incubated in 2x Laemmli buffer  
343 containing 2 mM saturated biotin and 20 mM DTT for 10 min at 95 degree.

344 For biotinylation after serum induction, cells were starved for 24 hrs as described in supplementary  
345 methods and induced with 10% serum containing media containing 50  $\mu$ M biotin for at least for 6 hrs  
346 to 24 hrs. Samples were processed for mass spectrometric analysis as described in Supplementary  
347 Methods.

348

349 **Microscopy and object-based colocalization analysis:** Cells were imaged with a Zeiss  
350 CellObserver fluorescence microscope equipped with a CCD camera (Axiocam 506) and operated by  
351 ZEN software (Zeiss). Image stacks were taken at 26-micron distance with either 40x,63x or 100x 1.4

352 NA oil immersion objectives. A representative slice was subjected to image processing and object-  
353 based localization. Particles were identified using the mexican hat filter plug-in available for Fiji which  
354 apply Laplacian of Gaussian filter to a 2D image. Object based localization was performed using the  
355 xsColoc imageJ plugin as described<sup>70</sup>. Briefly, the plugin determines the colocalization of objects in  
356 single snapshot frames by measuring the distance between closest neighbor objects from the  $\beta$ -actin  
357 mRNP (reference channel) and the protein (target channel). The analysis was restricted to the  
358 cytoplasm. Random colocalization was addressed by seeding objects from the target channel  
359 randomly into the defined area (cytoplasm), a process that was repeated 100 times. Particles from the  
360 reference channel were randomly assigned to clusters in the size of 100 particles. The fraction of  
361 colocalization as a function of maximal localization distance in each cluster was compared to the  
362 distribution of 100 simulated random values using the one sample student's t-test ( $\alpha=0.01$ ). The  
363 difference between the significant clusters to the random value was used in order to detect the 'real'  
364 co-localization<sup>32</sup>. Extraction, statistical analysis and plotting of the data produced by the xsColoc plugin  
365 were carried out in R using the R Studio front-end (<https://www.rstudio.com/>) and the ggplot2 library<sup>71</sup>  
366 to plot the graphs. The R script to analyze the data was written and kindly provided by Imre Gaspar.

367

368 **Data availability:** Proteomic data supporting this study has been deposited into PRIDE, accession  
369 no: PXD010694.

370

371 **Author Contributions:** JM and RPJ conceived the project. JM and OH performed experiments,  
372 analyzed the data and wrote the manuscript. MFW, NN, JM, and BM designed, performed and  
373 analyzed the mass spectrometry experiments. RPJ supervised the project, interpreted the data and  
374 wrote the manuscript.

375

376 **Acknowledgement:** We thank Jeff Chao (FMI, Basel), Imre Gaspar (EMBL, Heidelberg), Julién  
377 Bethune (BZH, Heidelberg), Stefan Kindler (U. Hamburg), Stefan Hüttelmaier (U. Halle), and Ibrahim  
378 Muhammad Syed (IFIB, U. Tübingen) for plasmids, cell lines, antibodies, or spike RNA. We are  
379 grateful to Frank Essmann (IFIB, U. Tübingen) and Silke Wahle (PCT, U. Tübingen), for technical  
380 support and Matthew Cheng (IFIB, U. Tübingen) for suggestions on the manuscript. The project was  
381 funded by the Deutsche Forschungsgemeinschaft (DFG-FOR2333).

382

383 **REFERENCES:**

- 384 1. Martin, K. C. & Ephrussi, A. mRNA localization: gene expression in the spatial dimension. *Cell*  
385 **136**, 719–30 (2009).
- 386 2. Buxbaum, A. R., Haimovich, G. & Singer, R. H. In the right place at the right time: visualizing  
387 and understanding mRNA localization. *Nat. Rev. Mol. Cell Biol.* **16**, 95–109 (2015).
- 388 3. Elisavich, C., Buxbaum, A. R., Katz, Z. B. & Singer, R. H. mRNA on the move: the road to its  
389 biological destiny. *J. Biol. Chem.* **288**, 20361–8 (2013).
- 390 4. Bullock, S. L. Messengers, motors and mysteries: sorting of eukaryotic mRNAs by cytoskeletal  
391 transport: Figure 1. *Biochem. Soc. Trans.* **39**, 1161–1165 (2011).
- 392 5. Marchand, V., Gaspar, I. & Ephrussi, A. An Intracellular Transmission Control Protocol:  
393 Assembly and transport of ribonucleoprotein complexes. *Current Opinion in Cell Biology*  
394 (2012). doi:10.1016/j.ceb.2011.12.014
- 395 6. Dreyfuss, G., Kim, V. N. & Kataoka, N. MESSENGER-RNA-BINDING PROTEINS AND THE  
396 MESSAGES THEY CARRY. *Nat. Rev. Mol. Cell Biol.* **3**, 195–205 (2002).
- 397 7. Kislauskis, E. H., Zhu, X. & Singer, R. H. beta-Actin messenger RNA localization and protein  
398 synthesis augment cell motility. *J. Cell Biol.* **136**, 1263–70 (1997).
- 399 8. Condeelis, J. & Singer, R. H. How and why does beta-actin mRNA target? *Biol. Cell* **97**, 97–  
400 110 (2005).
- 401 9. Bunnell, T. M., Burbach, B. J., Shimizu, Y. & Ervasti, J. M. Beta-Actin specifically controls cell  
402 growth, migration, and the G-actin pool. *Mol. Biol. Cell* **22**, 4047–4058 (2011).
- 403 10. Latham, V. M. J., Kislauskis, E. H., Singer, R. H. & Ross, A. F. Beta-actin mRNA localization is  
404 regulated by signal transduction mechanisms. *J. Cell Biol.* **126**, 1211–1219 (1994).
- 405 11. Yao, J., Sasaki, Y., Wen, Z., Bassell, G. J. & Zheng, J. Q. An essential role for beta-actin  
406 mRNA localization and translation in Ca<sup>2+</sup>-dependent growth cone guidance. *Nat. Neurosci.* **9**,  
407 1265–1273 (2006).
- 408 12. Leung, K. M. & Holt, C. E. Live visualization of protein synthesis in axonal growth cones by

- 409 microinjection of photoconvertible Kaede into *Xenopus* embryos. *Nat. Protoc.* (2008).  
410 doi:10.1038/nprot.2008.113
- 411 13. Eom, T., Antar, L. N., Singer, R. H. & Bassell, G. J. Localization of a beta-actin messenger  
412 ribonucleoprotein complex with zipcode-binding protein modulates the density of dendritic  
413 filopodia and filopodial synapses. *J. Neurosci.* **23**, 10433–44 (2003).
- 414 14. Kislauskis, E. H., Zhu, X. & Singer, R. H. Sequences responsible for intracellular localization of  
415 beta-actin messenger RNA also affect cell phenotype. *J. Cell Biol.* **127**, 441–51 (1994).
- 416 15. Yisraeli, J. K. VICKZ proteins: a multi-talented family of regulatory RNA-binding proteins. *Biol.*  
417 *Cell* **97**, 87–96 (2005).
- 418 16. Yoon, Y. J. *et al.* Glutamate-induced RNA localization and translation in neurons. *Proc. Natl.*  
419 *Acad. Sci. U. S. A.* **113**, E6877–E6886 (2016).
- 420 17. Hüttelmaier, S., Zenklusen, D., Lederer, M. & Dichtenberg, J. Spatial regulation of [beta]-actin  
421 translation by Src-dependent phosphorylation of ZBP1 : Abstract : Nature. *Nature* (2005).  
422 doi:10.1038/nature04115
- 423 18. Gilchrist, D. A., Fargo, D. C. & Adelman, K. Using ChIP-chip and ChIP-seq to study the  
424 regulation of gene expression: Genome-wide localization studies reveal widespread regulation  
425 of transcription elongation. *Methods* **48**, 398–408 (2009).
- 426 19. Hafner, M. *et al.* PAR-CLIP--a method to identify transcriptome-wide the binding sites of RNA  
427 binding proteins. *J. Vis. Exp.* 2–6 (2010). doi:10.3791/2034
- 428 20. Nicholson, C. O., Friedersdorf, M. & Keene, J. D. Quantifying RNA binding sites transcriptome-  
429 wide using DO-RIP-seq. *RNA* **23**, 32–46 (2017).
- 430 21. König, J. *et al.* iCLIP - Transcriptome-wide Mapping of Protein-RNA Interactions with Individual  
431 Nucleotide Resolution. *J. Vis. Exp.* (2011). doi:10.3791/2638
- 432 22. Zielinski, J. *et al.* In vivo identification of ribonucleoprotein-RNA interactions. *Proc. Natl. Acad.*  
433 *Sci.* **103**, 1557–1562 (2006).
- 434 23. Rogell, B. *et al.* Specific RNP capture with antisense LNA/DNA mixmers. *RNA* **23**, 1290–1302  
435 (2017).

- 436 24. Gaspar, I., Wippich, F. & Ephrussi, A. Enzymatic production of single-molecule FISH and RNA  
437 capture probes. *RNA* **23**, 1582–1591 (2017).
- 438 25. Roux, K. J., Kim, D. I. & Burke, B. BioID: A screen for protein-protein interactions. *Curr. Protoc.*  
439 *Protein Sci.* (2013). doi:10.1002/0471140864.ps1923s74
- 440 26. Kim, D. I. *et al.* Probing nuclear pore complex architecture with proximity-dependent  
441 biotinylation. *Proc. Natl. Acad. Sci.* **111**, E2453–E2461 (2014).
- 442 27. Kim, D. I., Jensen, S. C. & Roux, K. J. in *Methods in molecular biology (Clifton, N.J.)* **1411**,  
443 133–146 (2016).
- 444 28. Roux, K. J., Kim, D. I., Raida, M. & Burke, B. A promiscuous biotin ligase fusion protein  
445 identifies proximal and interacting proteins in mammalian cells. *J. Cell Biol.* **196**, 801–10  
446 (2012).
- 447 29. Ramanathan, M. *et al.* RNA–protein interaction detection in living cells. *Nat. Methods* **15**, 207–  
448 212 (2018).
- 449 30. Bell, J. L. *et al.* Insulin-like growth factor 2 mRNA-binding proteins (IGF2BPs): Post-  
450 transcriptional drivers of cancer progression? *Cellular and Molecular Life Sciences* **70**, 2657–  
451 2675 (2013).
- 452 31. Ceci, M. *et al.* RACK1 is a ribosome scaffold protein for  $\beta$ -actin mRNA/ZBP1 complex. *PLoS*  
453 *One* **7**, (2012).
- 454 32. Gu, W., Pan, F., Zhang, H., Bassell, G. J. & Singer, R. H. A predominantly nuclear protein  
455 affecting cytoplasmic localization of  $\beta$ -actin mRNA in fibroblasts and neurons. *J. Cell Biol.* **156**,  
456 41–51 (2002).
- 457 33. Itoh, M., Haga, I., Li, Q.-H. & Fujisawa, J. Identification of cellular mRNA targets for RNA-  
458 binding protein Sam68. *Nucleic Acids Res.* **30**, 5452–64 (2002).
- 459 34. Klein, M. E., Younts, T. J., Castillo, P. E. & Jordan, B. A. RNA-binding protein Sam68 controls  
460 synapse number and local  $\beta$ -actin mRNA metabolism in dendrites. *Proc. Natl. Acad. Sci.* **110**,  
461 3125–3130 (2013).
- 462 35. Castets, M. *et al.* FMRP interferes with the Rac1 pathway and controls actin cytoskeleton



- 463 dynamics in murine fibroblasts. *Hum. Mol. Genet.* **14**, 835–844 (2005).
- 464 36. Rackham, O. & Brown, C. M. Visualization of RNA–protein interactions in living cells: FMRP  
465 and IMP1 interact on mRNAs. *EMBO J.* **23**, 3346–3355 (2004).
- 466 37. Chung, H.-J. *et al.* FBPs Are Calibrated Molecular Tools To Adjust Gene Expression. *Mol.*  
467 *Cell. Biol.* **26**, 6584–6597 (2006).
- 468 38. Quinn, L. M. FUBP/KH domain proteins in transcription: Back to the future. *Transcription* **8**,  
469 185–192 (2017).
- 470 39. Blichenberg, a *et al.* Identification of a cis-acting dendritic targeting element in MAP2 mRNAs.  
471 *J. Neurosci.* **19**, 8818–8829 (1999).
- 472 40. Rehbein, M., Kindler, S., Horke, S. & Richter, D. Two trans-acting rat-brain proteins, MARTA1  
473 and MARTA2, interact specifically with the dendritic targeting element in MAP2 mRNAs. *Mol.*  
474 *Brain Res.* **79**, 192–201 (2000).
- 475 41. Peabody, D. S. The RNA binding site of bacteriophage MS2 coat protein. *Embo J* **12**, 595–600  
476 (1993).
- 477 42. Park, H. Y. *et al.* Visualization of dynamics of single endogenous mRNA labeled in live mouse.  
478 *Science (80-. )*. **343**, 422–424 (2014).
- 479 43. Lawrence, J. B. & Singer, R. H. Intracellular localization of messenger RNAs for cytoskeletal  
480 proteins. *Cell* **45**, 407–15 (1986).
- 481 44. Tyagi, S. & Alsmadi, O. Imaging native  $\beta$ -actin mRNA in motile fibroblasts. *Biophys. J.* **87**,  
482 4153–4162 (2004).
- 483 45. Dormoy-Raclet, V. *et al.* The RNA-Binding Protein HuR Promotes Cell Migration and Cell  
484 Invasion by Stabilizing the  $\beta$ -actin mRNA in a U-Rich-Element-Dependent Manner. *Mol. Cell.*  
485 *Biol.* **27**, 5365–5380 (2007).
- 486 46. Heraud-Farlow, J. E. & Kiebler, M. A. The multifunctional Staufen proteins: Conserved roles  
487 from neurogenesis to synaptic plasticity. *Trends in Neurosciences* **37**, 470–479 (2014).
- 488 47. McDermott, S. M., Meignin, C., Rappsilber, J. & Davis, I. Drosophila Syncrip binds the gurken

- 489 mRNA localisation signal and regulates localised transcripts during axis specification. *Biol.*  
490 *Open* **1**, 488–497 (2012).
- 491 48. Zivraj, K. H. *et al.* The RNA-binding protein MARTA2 regulates dendritic targeting of MAP2  
492 mRNAs in rat neurons. *J. Neurochem.* **124**, 670–684 (2013).
- 493 49. Lionnet, T. *et al.* A transgenic mouse for in vivo detection of endogenous labeled mRNA. *Nat.*  
494 *Methods* **8**, 165–170 (2011).
- 495 50. Gáspár, I., Sysoev, V., Komissarov, A. & Ephrussi, A. An RNA-binding atypical tropomyosin  
496 recruits kinesin-1 dynamically to oskar mRNPs. *EMBO J.* **36**, 319–333 (2017).
- 497 51. Elisavich, C., Shenoy, S. M. & Singer, R. H. Imaging mRNA and protein interactions within  
498 neurons. *Proc. Natl. Acad. Sci.* **114**, E1875–E1884 (2017).
- 499 52. Park, H. Y., Trcek, T., Wells, A. L., Chao, J. A. & Singer, R. H. An Unbiased Analysis Method  
500 to Quantify mRNA Localization Reveals Its Correlation with Cell Motility. *Cell Rep.* **1**, 179–184  
501 (2012).
- 502 53. Wu, B., Buxbaum, A. R., Katz, Z. B., Yoon, Y. J. & Singer, R. H. Quantifying Protein-mRNA  
503 Interactions in Single Live Cells. *Cell* **162**, 211–20 (2015).
- 504 54. Jønson, L. *et al.* Molecular composition of IMP1 ribonucleoprotein granules. *Mol. Cell.*  
505 *Proteomics* **6**, 798–811 (2007).
- 506 55. Mingle, L. A. *et al.* Localization of all seven messenger RNAs for the actin-polymerization  
507 nucleator Arp2/3 complex in the protrusions of fibroblasts. *J. Cell Sci.* **118**, 2425–2433 (2005).
- 508 56. Kim, H. H., Lee, S. J., Gardiner, A. S., Perrone-Bizzozero, N. I. & Yoo, S. Different motif  
509 requirements for the localization zipcode element of ??-actin mRNA binding by HuD and  
510 ZBP1. *Nucleic Acids Res.* **43**, (2015).
- 511 57. Farina, K. L., H??ttelmaier, S., Musunuru, K., Darnell, R. & Singer, R. H. Two ZBP1 KH  
512 domains facilitate ??-actin mRNA localization, granule formation, and cytoskeletal attachment.  
513 *J. Cell Biol.* **160**, 77–87 (2003).
- 514 58. Dominguez, D. *et al.* Sequence, Structure, and Context Preferences of Human RNA Binding  
515 Proteins. *Mol. Cell* **70**, 854–867.e9 (2018).

- 516 59. Bell, J. L. *et al.* Insulin-like growth factor 2 mRNA-binding proteins (IGF2BPs): post-  
517 transcriptional drivers of cancer progression? *Cell. Mol. Life Sci.* **70**, 2657–75 (2013).
- 518 60. Hollingworth, D. *et al.* KH domains with impaired nucleic acid binding as a tool for functional  
519 analysis. *Nucleic Acids Res.* **40**, 6873–86 (2012).
- 520 61. Stöhr, N. *et al.* IGF2BP1 promotes cell migration by regulating MK5 and PTEN signaling.  
521 *Genes Dev.* **26**, 176–89 (2012).
- 522 62. Roux, K. J. Marked by association: techniques for proximity-dependent labeling of proteins in  
523 eukaryotic cells. *Cell. Mol. Life Sci.* **70**, 3657–3664 (2013).
- 524 63. Schopp, I. M. *et al.* Split-BioID a conditional proteomics approach to monitor the composition  
525 of spatiotemporally defined protein complexes. *Nat. Commun.* **8**, 15690 (2017).
- 526 64. Rhee, H.-W. *et al.* Proteomic Mapping of Mitochondria in Living Cells via Spatially Restricted  
527 Enzymatic Tagging. *Science (80-. ).* **339**, 1328–1331 (2013).
- 528 65. Fallini, C. *et al.* Dynamics of survival of motor neuron (SMN) protein interaction with the  
529 mRNA-binding protein IMP1 facilitates its trafficking into motor neuron axons. *Dev. Neurobiol.*  
530 **74**, (2014).
- 531 66. Donlin-Asp, P. G. *et al.* The Survival of Motor Neuron Protein Acts as a Molecular Chaperone  
532 for mRNP Assembly. *Cell Rep.* **18**, 1660–1673 (2017).
- 533 67. Latham, V. M., Yu, E. H., Tullio, A. N., Adelstein, R. S. & Singer, R. H. A Rho-dependent  
534 signaling pathway operating through myosin localizes beta-actin mRNA in fibroblasts. *Curr.*  
535 *Biol.* **11**, 1010–6 (2001).
- 536 68. Song, T. *et al.* Specific interaction of KIF11 with ZBP1 regulates the transport of  $\beta$ -actin mRNA  
537 and cell motility. *J. Cell Sci.* **128**, (2015).
- 538 69. Donnelly, C. J., Fainzilber, M. & Twiss, J. L. Subcellular Communication Through RNA  
539 Transport and Localized Protein Synthesis. *Traffic* **11**, 1498–1505 (2010).
- 540 70. Gáspár, I., Sysoev, V., Komissarov, A. & Ephrussi, A. An RNA-binding atypical tropomyosin  
541 recruits kinesin-1 dynamically to *oskar* mRNPs. *EMBO J.* (2017).

542            doi:10.15252/embj.201696038

543    71.    Wickham, H. *Ggplot2. Elegant Graphics for Data Analysis* (2009). doi:10.1007/978-0-387-

544            98141-3

545

546 **FIGURES:**

547

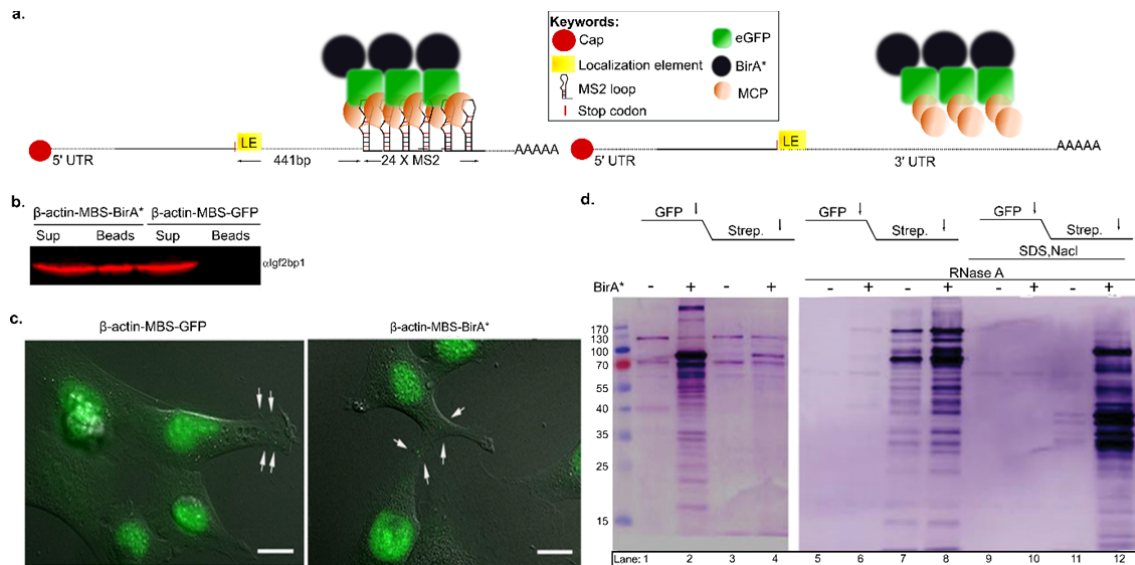

548

549

550

551 **Figure 1: RNA BioID to detect proteins interacting with localized  $\beta$ -actin RNA.**

552 (a) Schematic of the  $\beta$ -actin-MBS-BirA\* and control constructs to detect  $\beta$ -actin mRNA associated proteins. The  
 553 24xMS2 loop (24MBS) array was integrated in the 3'UTR of the endogenous  $\beta$ -actin gene 441 bp downstream of the  
 554 stop codon. BirA\* is targeted to 24MBS by fusing it to 2xMCP-eGFP (upper panel). Control cells expressed  
 555 2xMCP-eGFP-BirA\* and  $\beta$ -actin mRNA lacking the MBS cassette (lower panel).

556 (b) Biotinylation of IGF2BP1 depends on MBS sites in  $\beta$ -actin. Following RNase A treatment, biotinylated proteins  
 557 were affinity-purified with streptavidin-coated beads from cells expressing 2xMCP-eGFP-BirA\* in the presence  
 558 ( $\beta$ -actin-24MBS) or absence ( $\beta$ -actin) of MCP binding sites (MBS). Presence of IGF2BP1 was probed by a  
 559 specific antibody in bead fraction (Beads) and supernatant (Sup).

560 (c)  $\beta$ -actin-MBS MEFs expressing 2xMCP-eGFP (left panel) or 2xMCP-eGFP-BirA\* (right panel) form and  
 561 localize  $\beta$ -actin mRNP particles (arrows) after 24hr of serum starvation and 2 hr serum induction. The nuclear  
 562 accumulation of 2xMCP-eGFP or 2xMCP-eGFP-BirA\* originates from a nuclear localization signal (NLS) at the  
 563 N-terminus of the fusion proteins. Bar: 10  $\mu$ m.

564 (d) Specific enrichment of  $\beta$ -actin-MBS associated, biotinylated proteins are achieved by stringent conditions  
 565 during purification. Two consecutive affinity purifications (anti-GFP followed by streptavidin pull-down) were  
 566 performed. Western blots were stained for biotinylated proteins by streptavidin-alkaline peroxidase. Left panel:  
 567 The majority of the biotinylated proteins remain associated with 2xMCP-eGFP-BirA\* in the GFP pull-down fraction  
 568 under low-stringency purification conditions (lane 2). Combination of treatment with RNaseA (lane 6 versus 8), or  
 569 0.5% SDS and 500 mM NaCl (lane 10 versus 12) leads to quantitative enrichment of biotinylated proteins by  
 570 streptavidin pull-down.

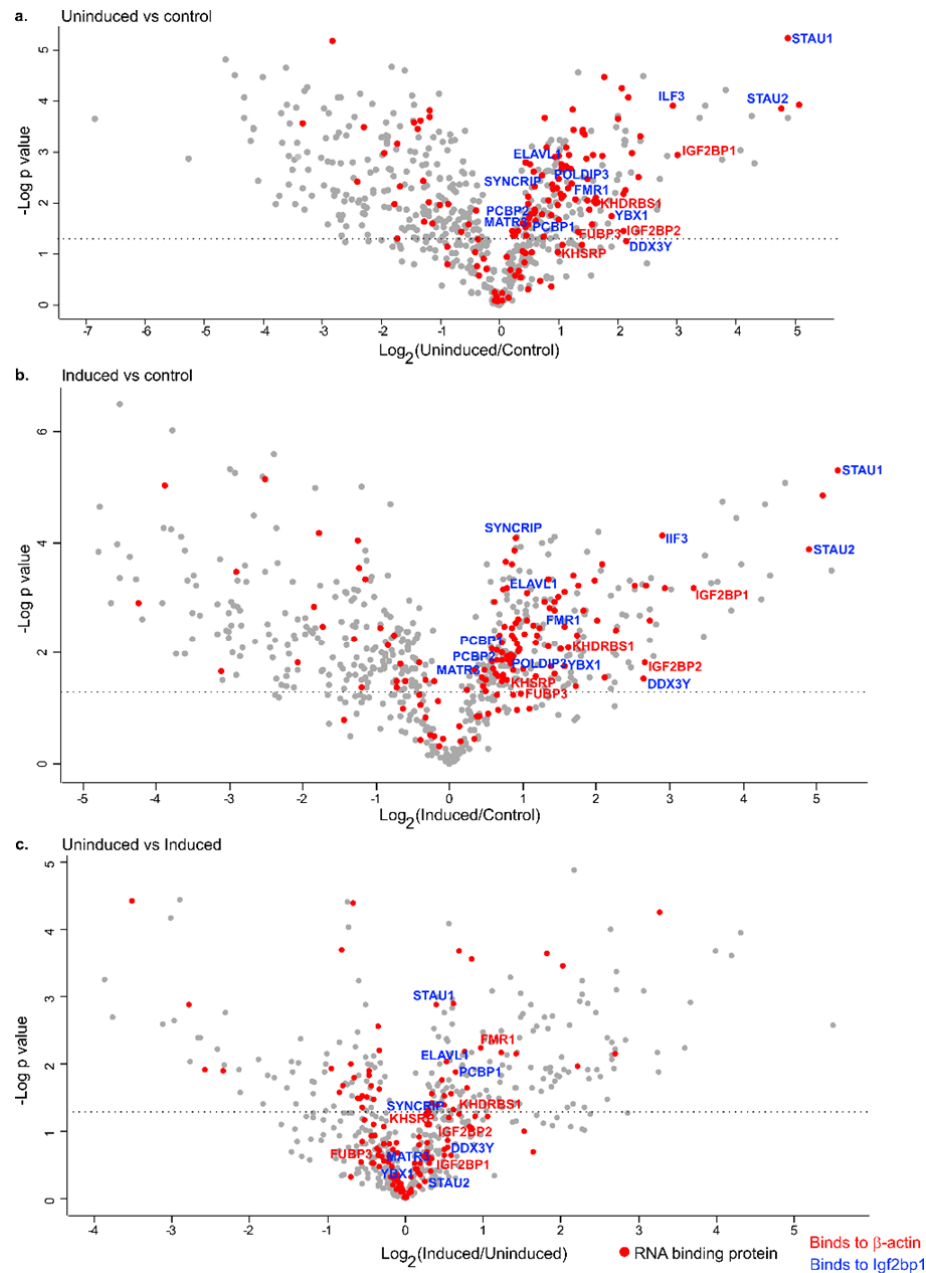

572 **Figure 2: Enrichment of biotinylated proteins in control MEFs, or MEFs expressing  $\beta$  actin-**  
 573 **MBS-BirA\* under serum-induced or uninduced conditions.**

574 Volcano plot representation of biotinylated proteins in

575 (a) uninduced MEFs compared to control MEFs,

576 (b) serum-induced MEFs compared to control MEFs.

577 (c) serum-induced MEFs compared to uninduced MEFs.

578 In the volcano plots, the X-axis represents log<sub>2</sub> fold change in protein abundance and the Y-axis represents the –  
 579 log<sub>10</sub> p-value. Red circles are known RBPs identified by GO-molecular function analysis. Proteins names in red  
 580 represent known  $\beta$ -actin mRNA interactors and proteins named in blue are RBPs known to bind to IGF2BP1.  
 581 Dotted line indicates p = 0.05.

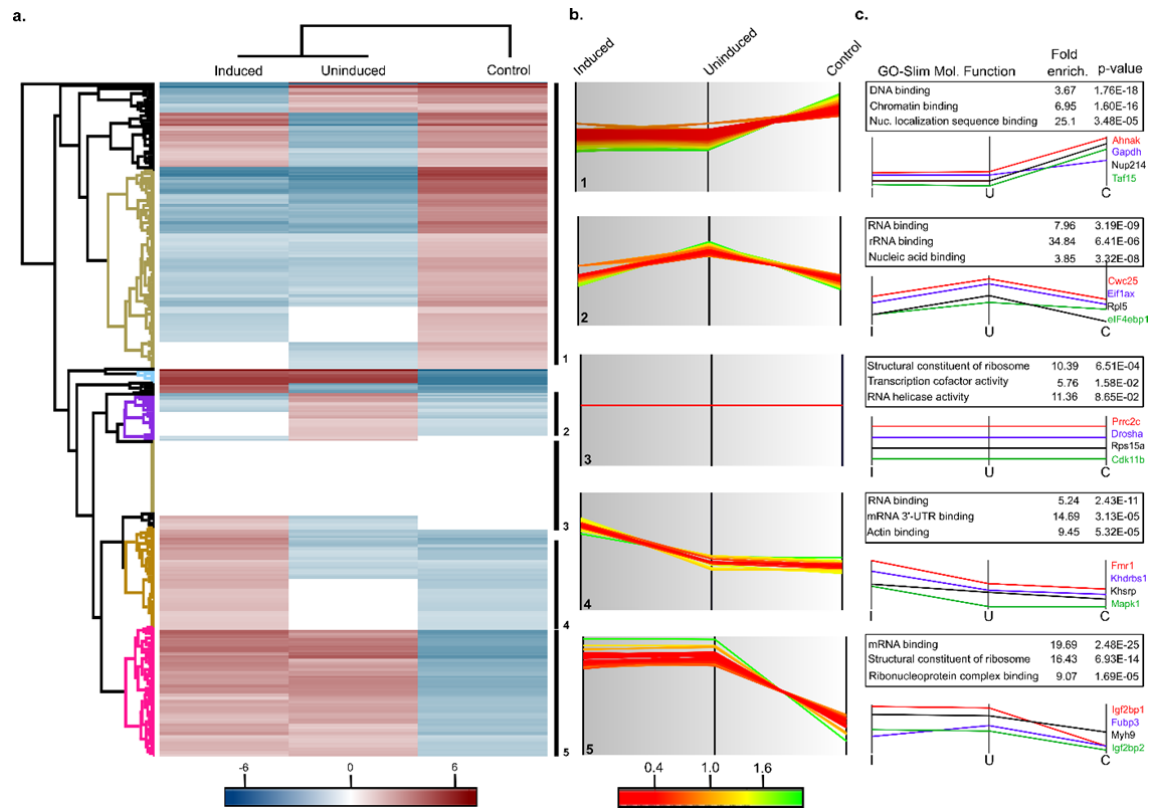

582

583

584 **Figure 3: Cluster analysis of biotinylated proteins in control MEFs or MEFs expressing  $\beta$ -actin-**  
 585 **MBS-BirA\* under serum-induced or uninduced conditions.**

586 (a) Hierarchical clustering of biotinylated proteins in serum-induced, uninduced  $\beta$ -actin-MBS-BirA\* MEFs and  
 587 control MEFs (lacking  $\beta$ -actin-MBS). Enrichment is indicated in red coloring, depletion in blue. Various clusters of  
 588 protein groups are highlighted in the dendrogram.

589 (b) Profile plots of five selected clusters showing distinct enrichment patterns of biotinylated proteins: 1. Strongly  
 590 enriched in control MEFs; 2. Enriched in  $\beta$ -actin-MBS-BirA\* MEFs under uninduced condition; 3. Similar  
 591 enrichment in all MEFs. 4. Enriched in  $\beta$ -actin-MBS-BirA\* MEFs under serum-induced conditions; 5. Enriched in  
 592  $\beta$ -actin-MBS-BirA\* MEFs under serum induced and uninduced conditions compared to the control MEFs. Degree  
 593 of enrichment in each specific cluster is represented by coloring (green, more enriched, red, less enriched).

594 (c) Functional analysis of protein annotation terms results in multiple categories that are enriched in the selected  
 595 clusters. GO-slim molecular function terms, the corresponding enrichment factor, and the p-value are shown in  
 596 the table. Selected examples of proteins found in each cluster are depicted below the tables.

597



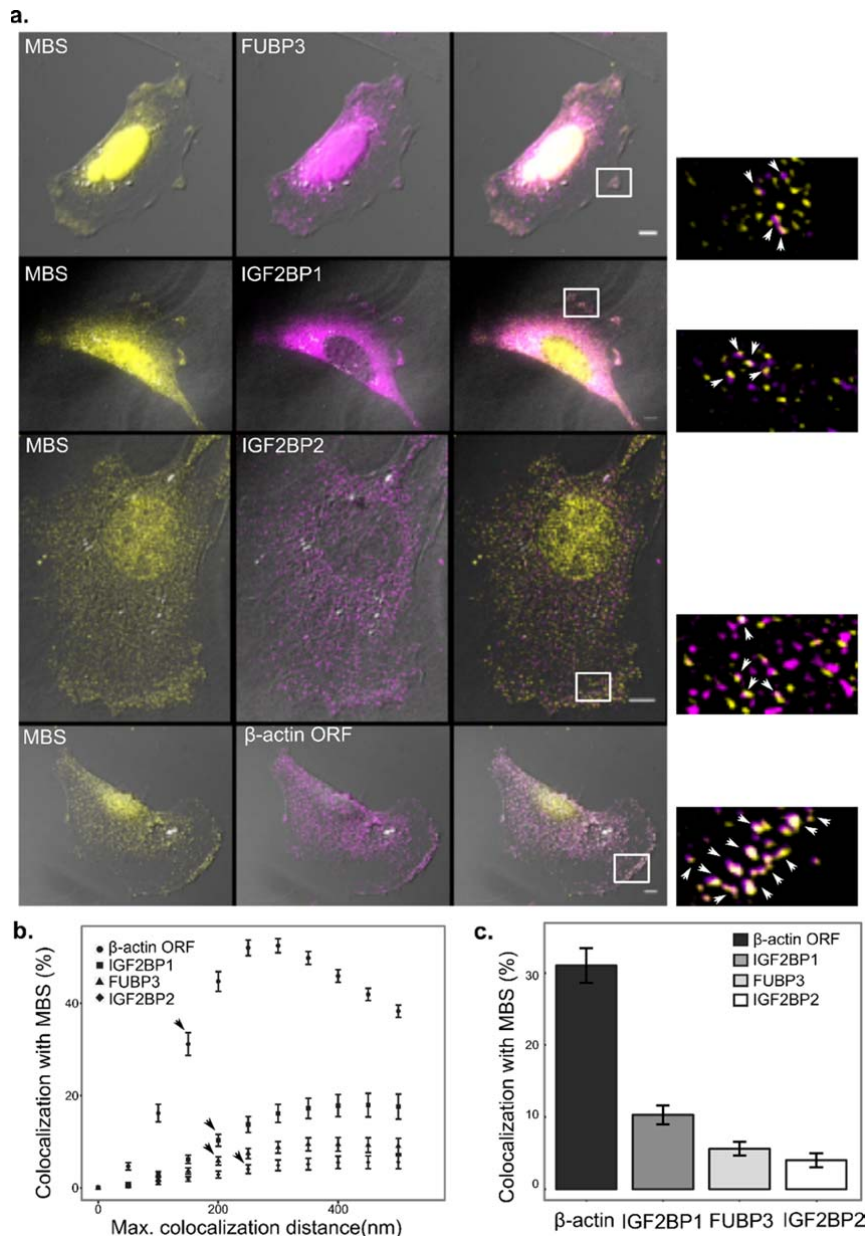

598

599 **Figure 4: Colocalization of IGF2BP1 and FUBP3 with β-actin-MBS mRNA.**

600 (a) Representative smFISH-immunofluorescence images in MEFs expressing β-actin-MBS. RNA is detected with  
 601 smFISH probes against MBS (yellow) or against β-actin ORF (magenta), proteins with antibodies against either  
 602 FUBP3, IGF2BP1, IGF2BP2 (magenta). Boxed areas indicate magnified regions. Arrows indicate colocalizing  
 603 objects. Scale bar represent 5 μm.

604 (b) Difference between observed and random estimated colocalization plotted as a function of maximal  
 605 colocalization distance. Arrows indicate the maximal colocalization distance chosen to analyze and compare the  
 606 ratio of colocalization presented in (c) (150 nm for β-actin ORF probes, 200 nm for IGF2BP1 and FUBP3 and 250  
 607 nm for IGF2BP2). This point was chosen as the midway between zero and the onset of the plateau which  
 608 represent the domination of random colocalization on the difference values. See Supplementary Figure S9 for  
 609 more data.

610 (c) Degree of colocalization of β-actin-MBS with β-actin ORF, IGF2BP1, FUBP3 or IGF2BP2. Histogram bars  
 611 represent the difference values at the maximal colocalization distance as indicated by the arrows in (b). Errors  
 612 bar represent 95% confidence interval.



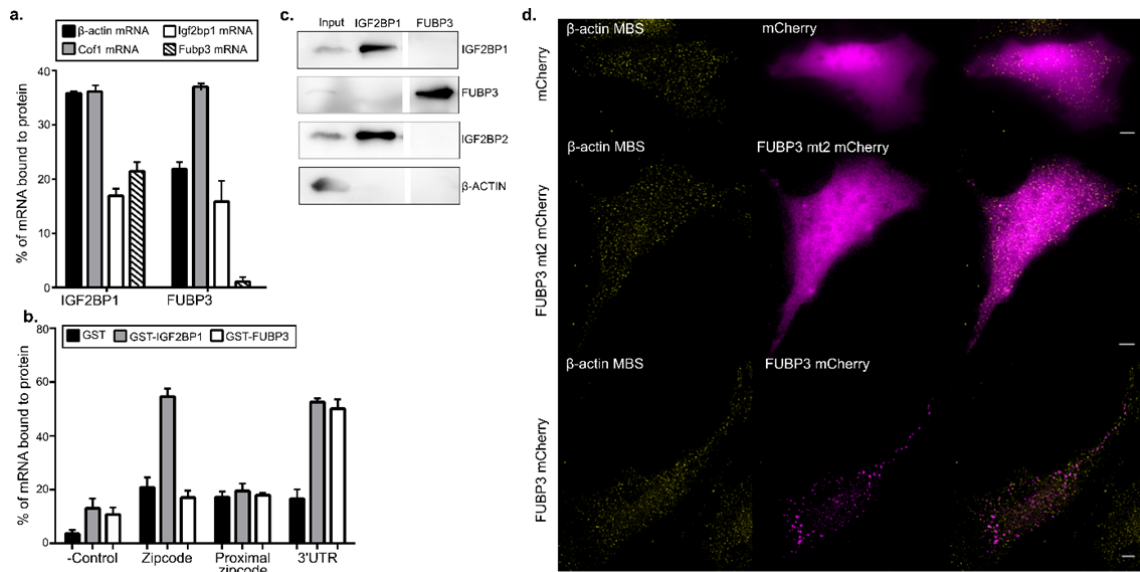

613

614 **Figure 5: FUBP3 binds to  $\beta$ -actin 3'UTR.**

615 a) Co-immunoprecipitation of selected mRNAs with IGF2BP1 and FUBP3. Bars represent percentage of input  
 616 mRNA co-purifying with the indicated protein. IGF2BP1 binds to several endogenous mRNAs such as, Cofilin1,  
 617 Igf2bp1 and Fubp3. FUBP3 binds to 23% of endogenous  $\beta$ -actin mRNA while IGF2BP1 was associated with 37%  
 618 of endogenous  $\beta$ -actin mRNA. Error bars represents mean  $\pm$  sem from three independent experiments.

619 (b) RNA pulldown of GST fusion proteins of IGF2BP1 and FUBP1. In vitro transcribed RNA fragments of  $\beta$ -actin  
 620 (zipcode, proximal zipcode, full-length 3'UTR, and a zipcode mutant as negative control) were added to *E. coli*  
 621 lysates with expressed GST or GST fusion proteins. Proteins and bound RNAs were isolated and bound RNA  
 622 detected by quantitative RT-PCR. Bars represent percentage of input RNA. IGF2BP1 shows high affinity for the  
 623 zipcode sequence whereas FUBP3 does not. Instead it binds to the 3'UTR. Error bars represents mean  $\pm$  sem  
 624 from three independent experiments.

625 (c) Co-immunoprecipitation of FUBP3 and IGF2BP1. Immunoprecipitation was performed from wild type MEFs  
 626 either with FUBP3 or IGF2BP1 specific antibodies. IGF2BP1 co-precipitates with IGF2BP2 but not with FUBP3.  
 627 FUBP3 co-purifies neither IGF2BP1 nor IGF2BP2.

628 (d) RNA-binding domain KH2 is required for FUBP3 cytoplasmic granule formation. The conserved G-X-X-G  
 629 motif of FUBP3 KH domains were individually mutated into G-D-D-G and wildtype and mutant proteins expressed  
 630 in MEFs as mCherry fusion. Live cell imaging shows that wild type FUBP3-mCherry forms cytoplasmic granules  
 631 whereas a KH2 mutant (FUBP3 mt2) is evenly distributed in the cytoplasm like the control mCherry protein. Scale  
 632 bar represent 5  $\mu$ m.

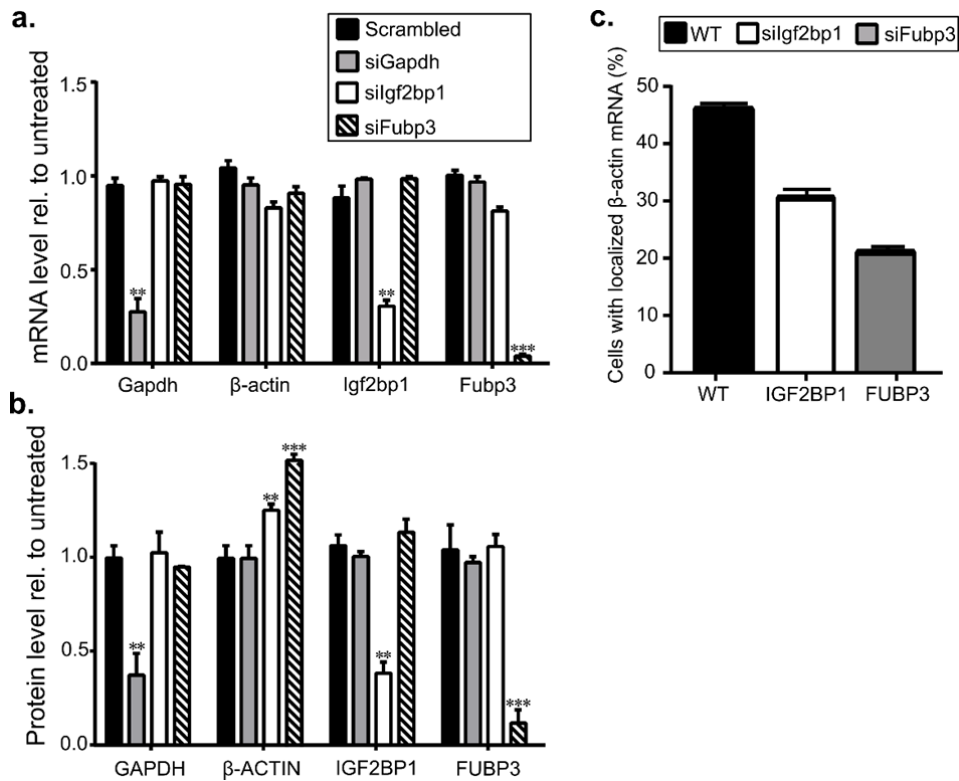

633

634

635 **Figure 6: Downregulation of Fubp3 affects β-actin mRNA localization.**

636 (a)-(c) Cells were treated for 72 hrs with scrambled siRNAs or siRNAs against Gapdh, Fubp3 or Igf2bp1.

637 (a) Quantitative RT-PCR analysis of Gapdh, Igf2bp1, β-actin, Fubp3 levels in knockdown cells. mRNAs in  
638 untreated cells was used to normalize.

639 (b) Western blot analysis of GAPDH, IGF2BP1, β-ACTIN, FUBP3 levels in knockdown cells. Protein levels in  
640 untreated cells were used as normalization control.

641 (c) Percentage of cells with localized β-actin mRNA in wild type MEFs and upon depletion of Igf2bp1 or Fubp3.  
642 Total number of cells analyzed is 562 in wild type, 241 in Igf2bp1 knockdown MEFs and 343 in Fubp3 knockdown  
643 MEFs. Localization of β-actin-MBS mRNA to the cell protrusions was manually scored by smFISH against β-actin  
644 MBS.

645 Statistical significance of each dataset was determined by Student's t-test; \*P < 0.05; \*\*\*P < 0.001. Error bars  
646 represents mean±sem from 3 independent experiments.
